# Supplementary material
Source: publisher figshare collection journal article supplement (https://tandf.figshare.com/ndownloader/files/13269617)
Supplement: Supplementary file 1 [file 13269617]

Fig. 2c– Contour plot showing the interaction between the urea and carbonate level on

biomass yield having the phosphate concentration as 0 under artificial light conditions.

Fig. 2d - Surface plot showing the interaction between the urea and carbonate level on

biomass yield having the phosphate concentration as 0 under artificial light conditions.

Fig. 2e – Contour plot showing the interaction between the phosphate and carbonate level on

biomass yield having the urea concentration as 0 under artificial light conditions.

Fig. 2f – Surface plot showing the interaction between the phosphate and carbonate level on

biomass yield having the urea concentration as 0 under artificial light conditions

Fig. 3c Contour plot showing the interaction between urea and carbonate on biomass yield

having the phosphate level as 0 at sunlight conditions.

Fig 3d. Surface plot showing the interaction between urea and carbonate on biomass yield

having the phosphate concentration of 0 at sunlight conditions.

Fig. 3e Contour plot showing the interaction between phosphate and carbonate on biomass

yield having the urea level as 0 at sunlight conditions.

Fig. 3f Surface plot showing the interaction between phosphate and carbonate level on

biomass yield having the urea concentration as 0 at sunlight conditions.

Fig. 5c Contour plot showing the interaction between dosage and pH on flocculation

efficiency.

Fig. 5d Surface plot showing the interaction between pH and dosage on flocculation

efficiency.

Fig. 5e Contour plot showing the interaction between temperature and pH on flocculation

efficiency.

Fig. 5f Surface plot showing the interaction between temperature and pH on flocculation

efficiency.
